# Supplementary material for: Robotic treatment of oligometastatic kidney tumor with synchronous pancreatic metastasis: case report and review of the literature
Source: Springer Nature journal article supplement (doi:10.1186/s12893-018-0371-x), 2018-06-12

PRISMA flow chart of literature search

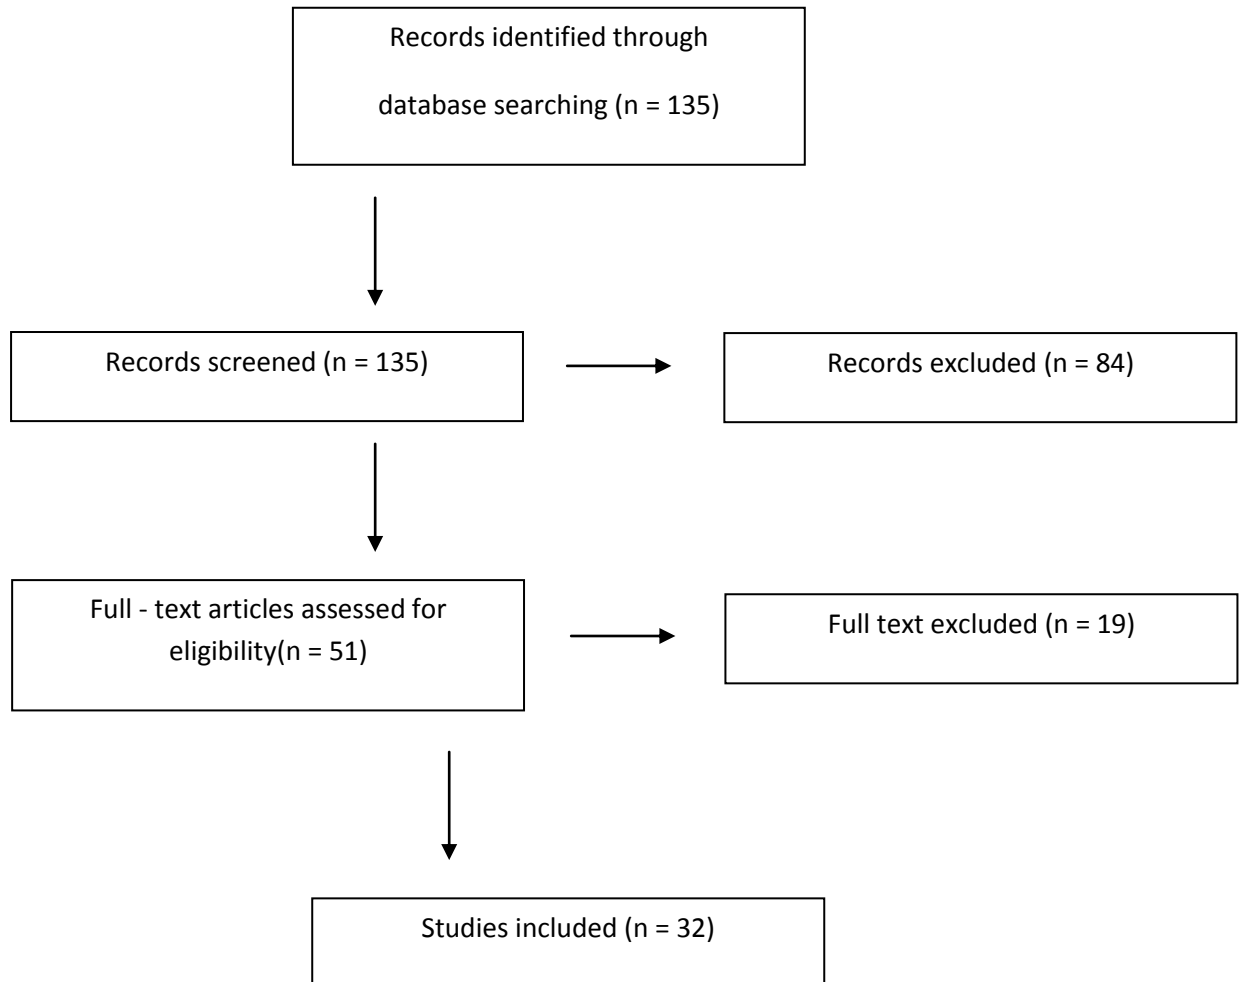

Supplement: MOESM1 [file 15843146]
